# Supplementary material for: Demographic Characteristics Associated With Perceptions of Personal Utility in Genetic and Genomic Testing: A Systematic Review
Source: PubMed Central journal article supplement (PMC10163389; doi:10.1001/jamanetworkopen.2023.10367), 2023-05-05
Supplement: jamanetwopen-e2310367-s001.pdf [file jamanetwopen-e2310367-s001.pdf]

## Supplementary Online Content

Miller EG, Young JL, Rao A, Ward-Lev E, Halley MC. Demographic characteristics associated with perceptions of personal utility in genetic and genomic testing: a systematic review. *JAMA Netw Open*. 2023;6(5):e2310367.  
doi:10.1001/jamanetworkopen.2023.10367

**eTable 1.** Search Strings

**eTable 2.** Synthesis of Demographic Categories

**eTable 3.** Complete Codebook

This supplementary material has been provided by the authors to give readers additional information about their work.

**eTable 1. Search Strings**

| <i>PubMed</i>                                                                                                                                                                                                                                                                                                                                                                                                                                                                                                                                                                                                                                                                                                                                                                                                                                                                                                                                                                                                                                                                                                                                                                                                                                                                                                                                                                                                                                                                                                                                                                                                                                                                                                                                                                                                                                                                                                                                                                                                                                                                                                                                                                                                                                                                                                                                                                                                                               |
|---------------------------------------------------------------------------------------------------------------------------------------------------------------------------------------------------------------------------------------------------------------------------------------------------------------------------------------------------------------------------------------------------------------------------------------------------------------------------------------------------------------------------------------------------------------------------------------------------------------------------------------------------------------------------------------------------------------------------------------------------------------------------------------------------------------------------------------------------------------------------------------------------------------------------------------------------------------------------------------------------------------------------------------------------------------------------------------------------------------------------------------------------------------------------------------------------------------------------------------------------------------------------------------------------------------------------------------------------------------------------------------------------------------------------------------------------------------------------------------------------------------------------------------------------------------------------------------------------------------------------------------------------------------------------------------------------------------------------------------------------------------------------------------------------------------------------------------------------------------------------------------------------------------------------------------------------------------------------------------------------------------------------------------------------------------------------------------------------------------------------------------------------------------------------------------------------------------------------------------------------------------------------------------------------------------------------------------------------------------------------------------------------------------------------------------------|
| <b>Search String 1:</b> ("genetic testing"[majr] OR "genetic testing"[tiab] OR "genetics testing"[tiab] OR "genome testing"[tiab] OR "genomic testing"[tiab] OR "genomics testing"[tiab] OR "genetic sequencing"[tiab] OR "genetics sequencing"[tiab] OR "genome sequencing"[tiab] OR "genomic sequencing"[tiab] OR "genomics sequencing"[tiab] OR "exome sequencing"[tiab] OR "exomic sequencing"[tiab] OR "sequence analysis, dna"[majr] OR "genetic profiling"[tiab] OR "genome profiling"[tiab] OR "genomic profiling"[tiab] OR "genomics profiling"[tiab] OR "direct to consumer testing"[tiab] OR "direct to consumer genetic"[tiab] OR "direct to consumer genetics"[tiab] OR "direct to consumer genome"[tiab] OR "direct to consumer genomic"[tiab] OR "direct to consumer genomics"[tiab] OR "personal genetic"[tiab] OR "personal genetics"[tiab] OR "personal genome"[tiab] OR "personal genomic"[tiab] OR "personal genomics"[tiab] OR "individual genetic"[tiab] OR "individual genetics"[tiab] OR "individual genome"[tiab] OR "individual genomic"[tiab] OR "individual genomics"[tiab] OR "genetic susceptibility testing"[tiab] OR "genomic risk profiling"[tiab] OR "genome based testing"[tiab]) AND ("personal utility"[tiab] OR "patient utility"[tiab] OR "individual utility"[tiab] OR "participant utility"[tiab] OR "consumer utility"[tiab] OR "public utility"[tiab] OR "health utility"[tiab] OR "health-related utility"[tiab] OR "perceived utility"[tiab] OR "patient-oriented utility"[tiab] OR "personal meaning"[tiab] OR "patient meaning"[tiab] OR "individual meaning"[tiab] OR "participant meaning"[tiab] OR "consumer meaning"[tiab] OR "public meaning"[tiab] OR "personal value"[tiab] OR "patient value"[tiab] OR "individual value"[tiab] OR "participant value"[tiab] OR "consumer value"[tiab] OR "public value"[tiab] OR "personal benefit"[tiab] OR "personal benefits"[tiab] OR "personal harm"[tiab] OR "personal harms"[tiab] OR "personal outcome"[tiab] OR "personal outcomes"[tiab] OR "non-clinical benefit"[tiab] OR "non-clinical benefits"[tiab] OR "nonclinical benefit"[tiab] OR "nonclinical benefits"[tiab] OR "non-medical benefit"[tiab] OR "non-medical benefits"[tiab] OR "nonmedical benefit"[tiab] OR "nonmedical benefits"[tiab] OR "psychological outcome"[tiab] OR "psychological impact"[tiab] OR "psychological outcomes"[tiab] OR "psychological impacts"[tiab]) |
| <b>Search String 2:</b> ("genetic testing"[majr] OR "genetic testing"[tiab] OR "genetics testing"[tiab] OR "genome testing"[tiab] OR "genomic testing"[tiab] OR "genomics testing"[tiab] OR "genetic sequencing"[tiab] OR "genetics sequencing"[tiab] OR "genome sequencing"[tiab] OR "genomic sequencing"[tiab] OR "genomics sequencing"[tiab] OR "exome sequencing"[tiab] OR "exomic sequencing"[tiab] OR "sequence analysis, dna"[majr] OR "genetic profiling"[tiab] OR "genome profiling"[tiab] OR "genomic profiling"[tiab] OR "genomics profiling"[tiab] OR "direct to consumer testing"[tiab] OR "direct to consumer genetic"[tiab] OR "direct to consumer genetics"[tiab] OR "direct to consumer genome"[tiab] OR "direct to consumer genomic"[tiab] OR "direct to consumer genomics"[tiab] OR "personal genetic"[tiab] OR "personal genetics"[tiab] OR "personal genome"[tiab] OR "personal genomic"[tiab] OR "personal genomics"[tiab] OR "individual genetic"[tiab] OR "individual genetics"[tiab] OR "individual genome"[tiab] OR "individual genomic"[tiab] OR "individual genomics"[tiab] OR "genetic susceptibility testing"[tiab] OR "genomic risk profiling"[tiab] OR "genome based testing"[tiab]) AND ((personal[ti] OR patient[ti] OR individual[ti] OR participant[ti] OR consumer[ti]) AND (utility[ti] OR meaning[ti] OR value[ti] OR benefit[ti]))                                                                                                                                                                                                                                                                                                                                                                                                                                                                                                                                                                                                                                                                                                                                                                                                                                                                                                                                                                                                                                                                  |
| <i>Scopus</i>                                                                                                                                                                                                                                                                                                                                                                                                                                                                                                                                                                                                                                                                                                                                                                                                                                                                                                                                                                                                                                                                                                                                                                                                                                                                                                                                                                                                                                                                                                                                                                                                                                                                                                                                                                                                                                                                                                                                                                                                                                                                                                                                                                                                                                                                                                                                                                                                                               |
| <b>Search String 1:</b> TITLE ( "genetic testing" OR "genetics testing" OR "genome testing" OR "genomic testing" OR "genomics testing" OR "genetic sequencing" OR "genetics sequencing" OR "genome sequencing" OR "genomic sequencing" OR "genomics sequencing" OR "exome sequencing" OR "exomic sequencing" OR "sequence analysis" OR "genetic profiling" OR "genome profiling" OR "genomic profiling" OR "genomics profiling" OR "direct to consumer testing" OR "direct to consumer genetic" OR "direct to consumer genetics" OR "direct to consumer genome" OR "direct to consumer genomic" OR "direct to consumer genomics" OR "personal genetic" OR "personal genetics" OR "personal genome" OR "personal genomic" OR "personal genomics" OR "individual genetic" OR "individual genetics" OR "individual genome" OR "individual genomic" OR "individual genomics" OR "genetic susceptibility testing" OR "genomic risk profiling" OR "genome based testing" ) AND TITLE-ABS-KEY ( "personal utility" OR "patient utility" OR "individual utility" OR "participant utility" OR "consumer utility" OR "public utility" OR "health utility" OR "health-related utility" OR "perceived utility" OR "patient-oriented utility" OR "personal meaning" OR "patient meaning" OR "individual meaning" OR "participant meaning" OR "consumer meaning" OR "public meaning"                                                                                                                                                                                                                                                                                                                                                                                                                                                                                                                                                                                                                                                                                                                                                                                                                                                                                                                                                                                                                                                                      |

OR "clinical meaning" OR "medical meaning" OR "personal value" OR "patient value" OR "individual value" OR "participant value" OR "consumer value" OR "public value" OR "psychological outcome" OR "psychological impact" OR "psychological outcomes" OR "psychological impacts" OR "personal benefit" OR "personal benefits" OR "personal harm" OR "personal harms" OR "personal outcome" OR "personal outcomes" OR "non-clinical benefit" OR "non-clinical benefits" OR "nonclinical benefit" OR "nonclinical benefits" OR "non-medical benefit" OR "non-medical benefits" OR "nonmedical benefit" OR "nonmedical benefits" ) AND ( LIMIT-TO ( LANGUAGE , "English" ) )

**Search String 2:** ( TITLE ( "genetic testing" OR "genetics testing" OR "genome testing" OR "genomic testing" OR "genomics testing" OR "genetic sequencing" OR "genetics sequencing" OR "genome sequencing" OR "genomic sequencing" OR "genomics sequencing" OR "exome sequencing" OR "exomic sequencing" OR "sequence analysis" OR "genetic profiling" OR "genome profiling" OR "genomic profiling" OR "genomics profiling" OR "direct to consumer testing" OR "direct to consumer genetic" OR "direct to consumer genetics" OR "direct to consumer genome" OR "direct to consumer genomic" OR "direct to consumer genomics" OR "personal genetic" OR "personal genetics" OR "personal genome" OR "personal genomic" OR "personal genomics" OR "individual genetic" OR "individual genetics" OR "individual genome" OR "individual genomic" OR "individual genomics" OR "genetic susceptibility testing" OR "genomic risk profiling" OR "genome based testing" ) ) AND ( TITLE ( personal OR patient OR individual OR participant OR consumer ) AND TITLE ( utility OR meaning OR value OR benefit ) )

### ***Web of Science***

**Search String 1:** TITLE: ("genetic testing" OR "genetics testing" OR "genome testing" OR "genomic testing" OR "genomics testing" OR "genetic sequencing" OR "genetics sequencing" OR "genome sequencing" OR "genomic sequencing" OR "genomics sequencing" OR "exome sequencing" OR "exomic sequencing" OR "sequence analysis" OR "genetic profiling" OR "genome profiling" OR "genomic profiling" OR "genomics profiling" OR "direct to consumer testing" OR "direct to consumer genetic" OR "direct to consumer genetics" OR "direct to consumer genome" OR "direct to consumer genomic" OR "direct to consumer genomics" OR "personal genetic" OR "personal genetics" OR "personal genome" OR "personal genomic" OR "personal genomics" OR "individual genetic" OR "individual genetics" OR "individual genome" OR "individual genomic" OR "individual genomics" OR "genetic susceptibility testing" OR "genomic risk profiling" OR "genome based testing") AND TOPIC: ("personal utility" OR "patient utility" OR "individual utility" OR "participant utility" OR "consumer utility" OR "public utility" OR "health utility" OR "health-related utility" OR "perceived utility" OR "patient-oriented utility" OR "personal meaning" OR "patient meaning" OR "individual meaning" OR "participant meaning" OR "consumer meaning" OR "public meaning" OR "psychological outcome" OR "psychological impact" OR "psychological outcomes" OR "psychological impacts" OR "personal value" OR "patient value" OR "individual value" OR "participant value" OR "consumer value" OR "public value" OR "clinical value" OR "medical value" OR "personal benefit" OR "personal benefits" OR "personal harm" OR "personal harms" OR "personal outcome" OR "personal outcomes" OR "non-clinical benefit" OR "non-clinical benefits" OR "nonclinical benefit" OR "nonclinical benefits" OR "non-medical benefit" OR "non-medical benefits" OR "nonmedical benefit" OR "nonmedical benefits")

Refined by:LANGUAGES: ( ENGLISH )

**Search String 2:** TITLE: ("genetic testing" OR "genetics testing" OR "genome testing" OR "genomic testing" OR "genomics testing" OR "genetic sequencing" OR "genetics sequencing" OR "genome sequencing" OR "genomic sequencing" OR "genomics sequencing" OR "exome sequencing" OR "exomic sequencing" OR "sequence analysis" OR "genetic profiling" OR "genome profiling" OR "genomic profiling" OR "genomics profiling" OR "direct to consumer testing" OR "direct to consumer genetic" OR "direct to consumer genetics" OR "direct to consumer genome" OR "direct to consumer genomic" OR "direct to consumer genomics" OR "personal genetic" OR "personal genetics" OR "personal genome" OR "personal genomic" OR "personal genomics" OR "individual genetic" OR "individual genetics" OR "individual genome" OR "individual genomic" OR "individual genomics" OR "genetic susceptibility testing" OR "genomic risk profiling" OR "genome based testing") AND TITLE: (((personal OR patient OR individual OR participant OR consumer ) AND ( utility OR meaning OR value OR benefit ))) Refined by:LANGUAGES: ( ENGLISH )

### ***Embase***

**Search String 1:** ('genetic screening'/exp/mj OR 'genetic testing':ti OR 'genetics testing':ti OR 'genome testing':ti OR 'genomic testing':ti OR 'genomics testing':ti OR 'genetic sequencing':ti OR 'genetics sequencing':ti OR 'genome sequencing':ti OR 'genomic sequencing':ti OR 'genomics sequencing':ti OR 'exome sequencing':ti OR 'exomic sequencing':ti OR 'sequence analysis'/exp/mj OR 'sequence analysis':ti OR 'genetic profiling':ti OR 'genome profiling':ti OR 'genomic profiling':ti OR 'genomics profiling':ti OR 'direct to consumer testing':ti OR 'direct to consumer genetic':ti OR 'direct to consumer genetics':ti OR 'direct to consumer genome':ti OR 'direct to consumer genomic':ti OR 'direct to consumer genomics':ti OR 'personal genetic':ti OR 'personal genetics':ti OR 'personal genome':ti OR 'personal genomic':ti OR 'personal genomics':ti OR 'individual genetic':ti OR 'individual genetics':ti OR 'individual genome':ti OR 'individual genomic':ti OR 'individual genomics':ti OR 'genetic susceptibility testing':ti OR 'genomic risk profiling':ti OR 'genome based testing':ti) AND ('personal utility':ab,ti OR 'patient utility':ab,ti OR 'individual utility':ab,ti OR 'participant utility':ab,ti OR 'consumer utility':ab,ti OR 'public utility':ab,ti OR 'health utility':ab,ti OR 'health-related utility':ab,ti OR 'perceived utility':t,ab OR 'patient-oriented utility':ti,ab OR 'personal meaning':ab,ti OR 'patient meaning':ab,ti OR 'individual meaning':ab,ti OR 'participant meaning':ab,ti OR 'consumer meaning':ab,ti OR 'public meaning':ab,ti OR 'clinical meaning':ab,ti OR 'medical meaning':ab,ti OR 'personal value':ab,ti OR 'patient value':ab,ti OR 'individual value':ab,ti OR 'participant value':ab,ti OR 'consumer value':ab,ti OR 'public value':ab,ti OR 'psychological outcome':ab,ti OR 'psychological impact':ab,ti OR 'psychological outcomes':ab,ti OR 'psychological impacts':ab,ti OR 'personal benefit':ab,ti OR 'personal benefits':ab,ti OR 'personal harm':ab,ti OR 'personal harms':ab,ti OR 'personal outcome':ab,ti OR 'personal outcomes':ab,ti OR 'non-clinical benefit':ab,ti OR 'non-clinical benefits':ab,ti OR 'nonclinical benefit':ab,ti OR 'nonclinical benefits':ab,ti OR 'non-medical benefit':ab,ti OR 'non-medical benefits':ab,ti OR 'nonmedical benefit':ab,ti OR 'nonmedical benefits':ab,ti) AND (([english]/lim AND ([embase]/lim OR [embase classic]/lim)))

**Search String 2:** (('genetic screening'/exp/mj OR 'genetic testing':ti OR 'genetics testing':ti OR 'genome testing':ti OR 'genomic testing':ti OR 'genomics testing':ti OR 'genetic sequencing':ti OR 'genetics sequencing':ti OR 'genome sequencing':ti OR 'genomic sequencing':ti OR 'genomics sequencing':ti OR 'exome sequencing':ti OR 'exomic sequencing':ti OR 'sequence analysis'/exp/mj OR 'sequence analysis':ti OR 'genetic profiling':ti OR 'genome profiling':ti OR 'genomic profiling':ti OR 'genomics profiling':ti OR 'direct to consumer testing':ti OR 'direct to consumer genetic':ti OR 'direct to consumer genetics':ti OR 'direct to consumer genome':ti OR 'direct to consumer genomic':ti OR 'direct to consumer genomics':ti OR 'personal genetic':ti OR 'personal genetics':ti OR 'personal genome':ti OR 'personal genomic':ti OR 'personal genomics':ti OR 'individual genetic':ti OR 'individual genetics':ti OR 'individual genome':ti OR 'individual genomic':ti OR 'individual genomics':ti OR 'genetic susceptibility testing':ti OR 'genomic risk profiling':ti OR 'genome based testing':ti) AND (personal:ti OR patient:ti OR individual:ti OR participant:ti OR consumer:ti AND (utility:ti OR meaning:ti OR value:ti OR benefit:ti) AND (([english]/lim AND ([embase]/lim OR [embase classic]/lim)))

**eTable 2.** Synthesis of Demographic Categories

| <b>A. Sex or Gender</b> |                                                                                                                                                        |
|-------------------------|--------------------------------------------------------------------------------------------------------------------------------------------------------|
| <b>Coded Categories</b> | <b>Original Terms in Manuscripts*</b>                                                                                                                  |
| Men or Male             | <ul style="list-style-type: none"> <li>• Male</li> <li>• Man</li> <li>• Boy</li> </ul>                                                                 |
| Other Categories        | <ul style="list-style-type: none"> <li>• Nonbinary</li> <li>• Transgender Male</li> <li>• Transgender Female</li> <li>• Other sex or gender</li> </ul> |
| Women or Female         | <ul style="list-style-type: none"> <li>• Female</li> <li>• Woman</li> <li>• Girl</li> </ul>                                                            |

\*These terms are quoted directly from the original manuscripts and therefore do not necessarily comply with current reporting standards.

| <b>B. Race and Ethnicity</b>              |                                                                                                                                                                                                                                                                       |
|-------------------------------------------|-----------------------------------------------------------------------------------------------------------------------------------------------------------------------------------------------------------------------------------------------------------------------|
| <b>Coded Categories</b>                   | <b>Original Terms in Manuscripts*</b>                                                                                                                                                                                                                                 |
| Asian American or Pacific Islander (AAPI) | <ul style="list-style-type: none"> <li>• Asian</li> <li>• Asian and not Hispanic or Latino</li> <li>• South Asian</li> <li>• East Asian</li> <li>• Asian American</li> <li>• Native Hawaiian</li> <li>• Pacific Islander</li> <li>• Asian/Pacific Islander</li> </ul> |
| Black                                     | <ul style="list-style-type: none"> <li>• Black</li> <li>• African American</li> <li>• African American and not Hispanic or Latino</li> <li>• Non-Hispanic Black</li> <li>• Sub-Saharan African</li> </ul>                                                             |
| Hispanic/Latino                           | <ul style="list-style-type: none"> <li>• Hispanic</li> <li>• Latinx</li> <li>• White/Hispanic</li> </ul>                                                                                                                                                              |

| <b>B. Race and Ethnicity</b>  |                                                                                                                                                                                                                                                                                                             |
|-------------------------------|-------------------------------------------------------------------------------------------------------------------------------------------------------------------------------------------------------------------------------------------------------------------------------------------------------------|
|                               | <ul style="list-style-type: none"> <li>• Latino</li> <li>• Hispanic White</li> <li>• Hispanic or Latino</li> </ul>                                                                                                                                                                                          |
| Multiracial                   | <ul style="list-style-type: none"> <li>• Mixed ethnicity</li> <li>• Mixed</li> <li>• Multiethnic/multiracial</li> <li>• Hispanic Black</li> <li>• Hispanic Asian</li> </ul>                                                                                                                                 |
| Native American or Indigenous | <ul style="list-style-type: none"> <li>• American Indian</li> <li>• Native American</li> <li>• Alaskan Native</li> </ul>                                                                                                                                                                                    |
| Other                         | <ul style="list-style-type: none"> <li>• Other race or ethnicity</li> <li>• Non-Hispanic or Latino, Other Race</li> <li>• West Indian</li> <li>• East Indian</li> <li>• Caribbean/South American</li> <li>• Ashkenazi Jewish</li> </ul>                                                                     |
| White                         | <ul style="list-style-type: none"> <li>• White</li> <li>• Caucasian</li> <li>• White/Non-Hispanic</li> <li>• Non-Latino White</li> <li>• White and not Hispanic or Latino</li> <li>• Western European</li> <li>• Other Mixed Caucasian</li> <li>• Southern European</li> <li>• Northern European</li> </ul> |

\*These terms are quoted directly from the original manuscripts and therefore do not necessarily comply with current reporting standards.

| <b>C. Education</b>                           |                                                                                                                                                                                               |
|-----------------------------------------------|-----------------------------------------------------------------------------------------------------------------------------------------------------------------------------------------------|
| <b>Coded Categories</b>                       | <b>Original Terms in Manuscripts*</b>                                                                                                                                                         |
| Less than College Degree: High School or Less | <ul style="list-style-type: none"> <li>• Some primary or elementary school, or completion</li> <li>• Some high school or secondary school, or high/secondary school degree, or GED</li> </ul> |
| Less than College Degree: Some College        | <ul style="list-style-type: none"> <li>• Some community college or community college degree</li> <li>• Vocational training</li> </ul>                                                         |

| <b>C. Education</b>                         |                                                                                                                                                                                                 |
|---------------------------------------------|-------------------------------------------------------------------------------------------------------------------------------------------------------------------------------------------------|
|                                             | <ul style="list-style-type: none"> <li>• Two-year college or associate's degree</li> <li>• Some technical school or technical school degree</li> <li>• Some college, some university</li> </ul> |
| Less than College Degree: Unspecified       | <ul style="list-style-type: none"> <li>• Less than a college degree</li> <li>• Greater than high school degree</li> </ul>                                                                       |
| College Degree or Higher: Unspecified       | <ul style="list-style-type: none"> <li>• Bachelor's degree or higher</li> <li>• College, advanced or professional degree</li> </ul>                                                             |
| College Degree or Higher: Bachelor's Degree | <ul style="list-style-type: none"> <li>• College or university degree</li> <li>• Bachelor's degree</li> </ul>                                                                                   |
| College Degree or Higher: Graduate Degree   | <ul style="list-style-type: none"> <li>• Master's degree</li> <li>• PhD, MD, other advance coursework or postgraduate degree</li> </ul>                                                         |

\*These terms are quoted directly from the original manuscripts and therefore do not necessarily comply with current reporting standards.

**eTable 3.** Complete Codebook

| Variable Name  | Variable Type | Definition                                                                                                                                                                                                                                                                                                                                                                                                                                                                                                                                                                                                                                                                                                                                           | Codes<br>If applicable                           |
|----------------|---------------|------------------------------------------------------------------------------------------------------------------------------------------------------------------------------------------------------------------------------------------------------------------------------------------------------------------------------------------------------------------------------------------------------------------------------------------------------------------------------------------------------------------------------------------------------------------------------------------------------------------------------------------------------------------------------------------------------------------------------------------------------|--------------------------------------------------|
| UPI            | Text          | Assigned unique identifier                                                                                                                                                                                                                                                                                                                                                                                                                                                                                                                                                                                                                                                                                                                           |                                                  |
| DOI            | Text          | Digital Object Identifier                                                                                                                                                                                                                                                                                                                                                                                                                                                                                                                                                                                                                                                                                                                            |                                                  |
| Title          | Text          | Study Title                                                                                                                                                                                                                                                                                                                                                                                                                                                                                                                                                                                                                                                                                                                                          |                                                  |
| Journal        | Text          | Journal Name or Abbreviation                                                                                                                                                                                                                                                                                                                                                                                                                                                                                                                                                                                                                                                                                                                         |                                                  |
| Year           | Text          | Year of Publication                                                                                                                                                                                                                                                                                                                                                                                                                                                                                                                                                                                                                                                                                                                                  |                                                  |
| N_Study        | Numeric       | Total number of all types of participants in the study.                                                                                                                                                                                                                                                                                                                                                                                                                                                                                                                                                                                                                                                                                              |                                                  |
| N_Patient      | Numeric       | Total number of individuals identified as patients in the study.                                                                                                                                                                                                                                                                                                                                                                                                                                                                                                                                                                                                                                                                                     |                                                  |
| N_Family       | Numeric       | Total number of individuals identified as family members of patients or caregivers in the study. Include here "advocates" or other individuals whose opinions are collected as a proxy for patients. Do not include individuals recruited as members of the general public who happen to be parents.                                                                                                                                                                                                                                                                                                                                                                                                                                                 |                                                  |
| N_Public       | Numeric       | Total number of individuals identified as members of the general public.                                                                                                                                                                                                                                                                                                                                                                                                                                                                                                                                                                                                                                                                             |                                                  |
| N_Ineligible   | Numeric       | Total number of individuals in the study who are not eligible (e.g., physicians, policymakers)                                                                                                                                                                                                                                                                                                                                                                                                                                                                                                                                                                                                                                                       |                                                  |
| N_Eligible     | Numeric       | Total number of patients, family members, or public included in the study.                                                                                                                                                                                                                                                                                                                                                                                                                                                                                                                                                                                                                                                                           |                                                  |
| Method_Type    | Categorical   | Indicates whether the paper primarily reporting on a quantitative or a qualitative method. Qualitative papers tended to be exploratory, small samples and involve interviews, focus groups, or case studies. Quantitative papers tended to use surveys and have larger sample sizes. If both methods were used, primary method determined by consensus review by the study team. For example, a study that included a sample in which all participants were interviewed and also complete a survey was characterized as qualitative. If all participants complete a survey and only a small subset are interviewed, then it is characterized as a quantitative. Other was used to categorize infrequently used methodologies (e.g., Delphi methods). | 1 = Quantitative<br>2 = Qualitative<br>3 = Other |
| Edu_Rep        | Binary        | Indicates whether the paper presents data on educational attainment for eligible participants.                                                                                                                                                                                                                                                                                                                                                                                                                                                                                                                                                                                                                                                       | 1=Yes<br>0=No                                    |
| N_HS_OrLess    | Numeric       | Number of participants categorized as having completed a high school degree or less.                                                                                                                                                                                                                                                                                                                                                                                                                                                                                                                                                                                                                                                                 |                                                  |
| N_Some_College | Numeric       | Number of participants categorized as having completing education beyond high school but not completed a four-year college degree.                                                                                                                                                                                                                                                                                                                                                                                                                                                                                                                                                                                                                   |                                                  |



| <b>Variable Name</b>         | <b>Variable Type</b> | <b>Definition</b>                                                                                                                                                                                             | <b>Codes<br/>If applicable</b> |
|------------------------------|----------------------|---------------------------------------------------------------------------------------------------------------------------------------------------------------------------------------------------------------|--------------------------------|
| N_LessThan_CollegeDeg_Unspec | Numeric              | Number of participants categorized as having not completed a four-year college degree. See Supplementary Appendix 2 for details. Only use if data not disaggregated by N_HS_OrLess and N_Some_College.        |                                |
| N_CollegeDeg_OrMore_Unspec   | Numeric              | Number of participants categorized as having completed a four-year college degree or more education. See Supplementary Appendix 2 for details. Only use if data not disaggregated by level of degree          |                                |
| N_Bachelor_Deg               | Numeric              | Number of participants categorized as having completed a four-year college degree.                                                                                                                            |                                |
| N_Graduate_Deg               | Numeric              | Number of participants categorized as having completed a graduate degree.                                                                                                                                     |                                |
| N_Edu_Miss                   | Numeric              | Number of participants for whom education data is missing, even though study does report education in general. Includes missing, not reported, or declined. Also includes undefined "other" category if used. |                                |
| N_Edu_Rep_Total              | Numeric              | Total number of individuals with reported education data (does not include those with missing data).                                                                                                          |                                |
| N_Inc_Rep                    | Binary               | Indicates whether the paper reports data on income for eligible participants.                                                                                                                                 | 1=Yes<br>0=No                  |
| N_Inc_Miss                   | Numeric              | Number of participants for whom income data is missing, even though study does report income in general. Includes missing, not reported, or declined.                                                         |                                |
| N_Inc_BelowMedian            | Numeric              | Number of participants with income below the U.S. median. Calculated using US population income distribution.                                                                                                 |                                |
| N_Inc_AboveMedian            | Numeric              | Number of participants with income above the U.S. median. Calculated using US population income distribution.                                                                                                 |                                |
| N_Inc_Rep                    | Numeric              | Total number of participants for with income data reported (does not include those with missing data).                                                                                                        |                                |
| Gen_Rep                      | Binary               | Indicates whether the paper reports data on sex or gender for eligible participants.                                                                                                                          | 1=Yes<br>0=No                  |
| Gender_Focus                 | Binary               | Indicates whether the paper focuses on (and only recruit) females or women. Includes studies on breast cancer and prenatal testing.                                                                           | 1=Yes<br>0=No                  |
| N_Women                      | Numeric              | Number of participants categorized as women or female.                                                                                                                                                        |                                |
| N_Men                        | Numeric              | Number of participants categorized as men or male.                                                                                                                                                            |                                |
| N_Gen_Other                  | Numeric              | Number of participants self-reporting a gender other than man or woman.                                                                                                                                       |                                |
| N_Gen_Miss                   | Numeric              | Number of participants for whom data on sex and gender is missing. Includes missing, not reported, or declined.                                                                                               |                                |

| <b>Variable Name</b> | <b>Variable Type</b> | <b>Definition</b>                                                                                                                                                                       | <b>Codes<br/>If applicable</b> |
|----------------------|----------------------|-----------------------------------------------------------------------------------------------------------------------------------------------------------------------------------------|--------------------------------|
| N_Gen_Rep_Total      | Numeric              | Total number of individuals with reported data on sex or gender (does not include those with missing data).                                                                             |                                |
| Race_Rep             | Binary               | Indicates whether the paper reports race and/or ethnicity data. Do not treat country of origin as race or ethnicity if this is the only information provided.                           | 1=Yes<br>0=No                  |
| Diversity_Focus      | Binary               | Indicates whether the study explicitly states a focus (and only recruit) individuals from diverse racial or eth.                                                                        | 1=Yes<br>0=No                  |
| N_NHWhite            | Numeric              | Number of participants categorized as non-Hispanic White.                                                                                                                               |                                |
| N_Black              | Numeric              | Number of participants categorized as Black.                                                                                                                                            |                                |
| N_HispLatx           | Numeric              | Number of participants categorized as Hispanic or Latinx.                                                                                                                               |                                |
| N_AAPI               | Numeric              | Number of participants categorized as Asian-American or Pacific Islander.                                                                                                               |                                |
| N_Native_Indig       | Numeric              | Number of participants categorized as Native American or another indigenous group.                                                                                                      |                                |
| N_Multiracial        | Numeric              | Number of participants categorized as multiracial.                                                                                                                                      |                                |
| N_Race_Other         | Numeric              | Number of participants categorized as another race or ethnicity.                                                                                                                        |                                |
| N_Race_Miss          | Numeric              | Number of participants for whom race and ethnicity data is reported as missing, even though study does report this information in general. Includes missing, not reported, or declined. |                                |
| N_Race_Rep_Total     | Numeric              | Total number of individuals with reported race and/or ethnicity data (does not include those with missing data).                                                                        |                                |
| Race_Discrete        | Binary               | Indicates a study in which individuals were allowed to select multiple options for race and/or ethnicity.                                                                               | 1=Yes<br>0=No                  |
