# Supplementary material for: Demographic Characteristics Associated With Perceptions of Personal Utility in Genetic and Genomic Testing: A Systematic Review
Source: PubMed Central journal article supplement (PMC10163389; doi:10.1001/jamanetworkopen.2023.10367), 2023-05-05
Supplement: jamanetwopen-e2310367-s003.pdf [file jamanetwopen-e2310367-s003.pdf]

## Data Sharing Statement

Miller. Demographic Characteristics Associated With Perceptions of Personal Utility in Genetic and Genomic Testing. *JAMA Netw Open*. Published May 05, 2023.

doi:10.1001/jamanetworkopen.2023.10367

### Data

**Data available:** Yes

**Data types:** Data (not involving human participants)

**How to access data:** The final dataset and data dictionary can be accessed here:

<https://datadryad.org/stash/share/QfzdaoihOuHMabnQQOMywoY0nozZ1dnA6w5QH0ARpKA>

**When available:** With publication

### Supporting Documents

**Document types:** None

### Additional Information

**Who can access the data:** Publicly available.

**Types of analyses:** Any purpose.

**Mechanisms of data availability:** Publicly available.

**Any additional restrictions:** None.
